# Supplementary material for: Why current risk factor-based approaches fall short in predicting stillbirth: a national cohort study of nulliparous women in England
Source: Springer Nature journal article supplement (doi:10.1186/s12916-025-04598-7), 2026-01-22
Supplement: MOESM1 [file 12916_2025_4598_MOESM1_ESM.docx]

*Additional file: Table 1*

| **Pregnancy Outcome** | **Overall, N = 876,629**  **N (%)** | **Stillbirth, N = 2,568**  **N (%)** | **Rate per 1000 births** |
| --- | --- | --- | --- |
| ***Maternal characteristics*** |  |  |  |
| **Ethnicity** |  |  |  |
| White British | 492,931 (66.4%) | 1,321 (60.1%) | 2.68 |
| White other | 93,462 (12.6%) | 239 (10.9%) | 2.56 |
| Asian - Indian or Bangladeshi - | 36,557 (4.9%) | 141 (6.4%) | 3.86 |
| Asian - other | 16,225 (2.2%) | 55 (2.5%) | 3.39 |
| Asian - Pakistani | 27,027 (3.6%) | 136 (6.2%) | 5.03 |
| Black African | 17,598 (2.4%) | 107 (4.9%) | 6.08 |
| Black other | 11,609 (1.6%) | 64 (2.9%) | 5.51 |
| Mixed ethnicity | 13,766 (1.9%) | 45 (2.0%) | 3.27 |
| Other ethnicity | 32,924 (4.4%) | 89 (4.1%) | 2.70 |
| Unknown | 134,530 | 371 |  |
| **Age of woman at booking (years)** |  |  |  |
| <20 | 54,019 (6.2%) | 178 (6.9%) | 3.30 |
| 20-24 | 163,883 (18.7%) | 517 (20.1%) | 3.15 |
| 25-29 | 267,116 (30.5%) | 732 (28.5%) | 2.74 |
| 30-34 | 254,733 (29.1%) | 679 (26.4%) | 2.67 |
| 35-39 | 113,829 (13.0%) | 371 (14.4%) | 3.26 |
| ≥40 | 23,049 (2.6%) | 91 (3.5%) | 3.95 |
| **Body mass index at booking** |  |  |  |
| Underweight (<18.5) | 41,375 (6.0%) | 90 (4.4%) | 2.18 |
| Normal weight (18.5 to <25) | 338,368 (49.2%) | 933 (45.5%) | 2.76 |
| Overweight (25 to <30) | 180,156 (26.2%) | 561 (27.3%) | 3.11 |
| Obesity class I (30 to <35) | 79,332 (11.5%) | 261 (12.7%) | 3.29 |
| Obesity class II (35 to <40) | 31,795 (4.6%) | 121 (5.9%) | 3.81 |
| Obesity class III (≥40) | 16,819 (2.4%) | 86 (4.2%) | 5.11 |
| Unknown | 188,784 | 516 |  |
| ***Pregnancy related characteristics*** |  |  |  |
| **Previous number of miscarriages** |  |  |  |
| 0 | 564,582 (86.7%) | 1,677 (85.3%) | 2.97 |
| 1 | 63,087 (9.7%) | 219 (11.1%) | 3.47 |
| 2 | 16,158 (2.5%) | 42 (2.1%) | 2.60 |
| ≥3 | 7,092 (1.1%) | 27 (1.4%) | 3.81 |
| Unknown | 225,710 | 603 |  |
| **Smoking status at booking** |  |  |  |
| Current | 82,894 (11.2%) | 349 (16.1%) | 4.21 |
| Ex smoker -after conception | 57,327 (7.7%) | 150 (6.9%) | 2.62 |
| Ex smoker -more than 1y before conception | 47,826 (6.5%) | 129 (6.0%) | 2.70 |
| Ex smoker -within 1y before conception | 27,449 (3.7%) | 60 (2.8%) | 2.19 |
| Never smoked | 422,733 (57.1%) | 1,192 (55.1%) | 2.82 |
| Non-smoker (history unknown) | 102,350 (13.8%) | 284 (13.1%) | 2.77 |
| Unknown | 136,050 | 404 |  |
| **Substance misuse status** |  |  |  |
| Current use | 5,422 (0.9%) | 30 (1.7%) | 5.53 |
| Never used | 577,624 (95.4%) | 1,680 (93.3%) | 2.91 |
| Previously used | 22,679 (3.7%) | 91 (5.1%) | 4.01 |
| Unknown | 270,904 | 767 |  |
| **Alcohol units consumed per week** |  |  |  |
| 0 | 404,720 (96.9%) | 1,117 (96.8%) | 2.76 |
| 1-14 | 13,049 (3.1%) | 37 (3.2%) | 3.02 |
| Unknown | 458,860 | 1,414 |  |
| **Folic Acid Supplement** |  |  |  |
| Has been taking prior to becoming pregnant | 176,467 (31.4%) | 385 (23.5%) | 2.18 |
| Not taking folic acid supplement | 41,664 (7.4%) | 173 (10.5%) | 4.15 |
| Started taking once pregnancy confirmed | 343,861 (61.2%) | 1,082 (66.0%) | 3.15 |
| Unknown | 314,637 | 928 |  |
| **Antenatal booking after 12 weeks** |  |  |  |
| Yes | 142,853 (16.3%) | 523 (20.4%) | 3.66 |
| No | 733,776 (83.7%) | 2,045 (79.6%) | 2.79 |
| ***Social complexities*** |  |  |  |
| **Complex Social Factors** |  |  |  |
| Yes | 77,324 (11.5%) | 294 (14.7%) | 3.80 |
| No | 596,639 (88.5%) | 1,703 (85.3%) | 2.85 |
| Unknown | 202,666 | 571 |  |
| **Index of multiple deprivation (quintiles)** |  |  |  |
| 1 - Most deprived | 220,924 (25.7%) | 787 (31.4%) | 3.56 |
| 2 | 195,288 (22.7%) | 611 (24.4%) | 3.13 |
| 3 | 165,242 (19.2%) | 461 (18.4%) | 2.79 |
| 4 | 150,080 (17.4%) | 359 (14.3%) | 2.39 |
| 5 - Least deprived | 128,761 (15.0%) | 288 (11.5%) | 2.24 |
| Unknown | 16,334 | 62 |  |
| ***Family history*** |  |  |  |
| **Congenital disorders** |  |  |  |
| No | 858,507 (97.9%) | 2,511 (97.8%) | 2.92 |
| Yes | 18,122 (2.1%) | 57 (2.2%) | 3.15 |
| **Inherited disorders** |  |  |  |
| No | 860,129 (98.1%) | 2,520 (98.1%) | 2.93 |
| Yes | 16,500 (1.9%) | 48 (1.9%) | 2.91 |
| **Diabetes** |  |  |  |
| No | 732,928 (83.6%) | 2,112 (82.2%) | 2.88 |
| Yes | 143,701 (16.4%) | 456 (17.8%) | 3.17 |
| **Hypertensive disorder** |  |  |  |
| No | 746,767 (85.2%) | 2,207 (85.9%) | 2.96 |
| Yes | 129,862 (14.8%) | 361 (14.1%) | 2.78 |
| **Mental health conditions** |  |  |  |
| No | 844,910 (96.4%) | 2,481 (96.6%) | 2.94 |
| Yes | 31,719 (3.6%) | 87 (3.4%) | 2.74 |
| **Multifetal** |  |  |  |
| No | 832,090 (94.9%) | 2,411 (93.9%) | 2.90 |
| Yes | 44,539 (5.1%) | 157 (6.1%) | 3.53 |
| **Pregnancy hypertension** |  |  |  |
| No | 864,234 (98.6%) | 2,530 (98.5%) | 2.93 |
| Yes | 12,395 (1.4%) | 38 (1.5%) | 3.07 |
| ***Health status at booking*** |  |  |  |
| **Hypertension** |  |  |  |
| No | 870,940 (99.4%) | 2,556 (99.5%) | 2.93 |
| Yes | 5,689 (0.6%) | 12 (0.5%) | 2.11 |
| **Gynaecological problems** |  |  |  |
| No | 821,096 (93.7%) | 2,435 (94.8%) | 2.97 |
| Yes | 55,533 (6.3%) | 133 (5.2%) | 2.39 |
| **Cardiac disorder** |  |  |  |
| No | 870,451 (99.3%) | 2,555 (99.5%) | 2.94 |
| Yes | 6,178 (0.7%) | 13 (0.5%) | 2.10 |
| **Mental health conditions** |  |  |  |
| No | 819,749 (93.5%) | 2,376 (92.5%) | 2.90 |
| Yes | 56,880 (6.5%) | 192 (7.5%) | 3.38 |
| **Pre-existing diabetes** |  |  |  |
| No | 869,370 (99.2%) | 2,518 (98.1%) | 2.90 |
| Yes | 7,259 (0.8%) | 50 (1.9%) | 6.89 |
| ***Adverse pregnancy outcomes*** |  |  |  |
| **Severe preeclampsia** |  |  |  |
| No | 875,398 (99.9%) | 2,565 (99.9%) | 2.93 |
| Yes | 1,231 (0.1%) | 3 (0.1%) | 2.44 |
| **Eclampsia** |  |  |  |
| No | 876,196 (100.0%) | 2,565 (99.9%) | 2.93 |
| Yes | 433 (0.0%) | 3 (0.1%) | 6.93 |
| **Gestation diabetes mellitus** |  |  |  |
| No | 867,974 (99.0%) | 2,555 (99.5%) | 2.94 |
| Yes | 8,655 (1.0%) | 13 (0.5%) | 1.50 |
| **Gestational hypertension** |  |  |  |
| No | 873,928 (99.7%) | 2,561 (99.7%) | 2.93 |
| Yes | 2,701 (0.3%) | 7 (0.3%) | 2.59 |
| **Antepartum haemorrhage** |  |  |  |
| No | 873,694 (99.7%) | 2,557 (99.6%) | 2.93 |
| Yes | 2,935 (0.3%) | 11 (0.4%) | 3.75 |
| ***Baby characteristics*** |  |  |  |
| **Fetal growth restriction (<10th percentile)** |  |  |  |
| No | 466,641 (87.3%) | 875 (55.7%) | 1.88 |
| Yes | 67,995 (12.7%) | 696 (44.3%) | 10.24 |
| Unknown | 341,993 | 997 |  |
