# Supplementary material for: Why current risk factor-based approaches fall short in predicting stillbirth: a national cohort study of nulliparous women in England
Source: Springer Nature journal article supplement (doi:10.1186/s12916-025-04598-7), 2026-01-22
Supplement: MOESM2 [file 12916_2025_4598_MOESM2_ESM.docx]

*Additional file: Table 2*

| Pregnancy Outcome |  |  |  |  |  |  |
| --- | --- | --- | --- | --- | --- | --- |
| **N complete** | **N missing** | **% missing** | **Incidence in complete group** | **Incidence in missing group** | **p-value** |
| *Maternal characteristics* |  |  |  |  |  |  |
| Ethnicity |  |  |  |  |  | **0.991** |
| White British | 578,814 (66.0%) | 492,931 (66.4%) | 14.8% | 1,570 (61.1%) | 1,321 (60.1%) |  |
| White other | 112,369 (12.8%) | 93,462 (12.6%) | 16.8% | 287 (11.2%) | 239 (10.9%) |  |
| Asian - Indian or Bangladeshi - | 43,352 (4.9%) | 36,557 (4.9%) | 15.7% | 165 (6.4%) | 141 (6.4%) |  |
| Asian - other | 19,380 (2.2%) | 16,225 (2.2%) | 16.3% | 60 (2.3%) | 55 (2.5%) |  |
| Asian - Pakistani | 31,846 (3.6%) | 27,027 (3.6%) | 15.1% | 145 (5.6%) | 136 (6.2%) |  |
| Black African | 21,118 (2.4%) | 17,598 (2.4%) | 16.7% | 114 (4.4%) | 107 (4.9%) |  |
| Black other | 13,909 (1.6%) | 11,609 (1.6%) | 16.5% | 71 (2.8%) | 64 (2.9%) |  |
| Mixed ethnicity | 16,448 (1.9%) | 13,766 (1.9%) | 16.3% | 53 (2.1%) | 45 (2.0%) |  |
| Other ethnicity | 39,393 (4.5%) | 32,924 (4.4%) | 16.4% | 103 (4.0%) | 89 (4.1%) |  |
| Age of woman at booking (years) |  |  |  |  |  | **1.00** |
| <20 | 54,026 (6.2%) | 54,019 (6.2%) | 0.0% | 178 (6.9%) | 178 (6.9%) |  |
| 20-24 | 163,899 (18.7%) | 163,883 (18.7%) | 0.0% | 517 (20.1%) | 517 (20.1%) |  |
| 25-29 | 267,062 (30.5%) | 267,116 (30.5%) | 0.0% | 732 (28.5%) | 732 (28.5%) |  |
| 30-34 | 254,751 (29.1%) | 254,733 (29.1%) | 0.0% | 679 (26.4%) | 679 (26.4%) |  |
| 35-39 | 113,835 (13.0%) | 113,829 (13.0%) | 0.0% | 371 (14.4%) | 371 (14.4%) |  |
| ≥40 | 23,056 (2.6%) | 23,049 (2.6%) | 0.0% | 91 (3.5%) | 91 (3.5%) |  |
| Body mass index at booking |  |  |  |  |  | **0.997** |
| Underweight (<18.5) | 48,541 (5.5%) | 41,375 (6.0%) | 14.8% | 112 (4.4%) | 90 (4.4%) |  |
| Normal weight (18.5 to <25) | 432,394 (49.3%) | 338,368 (49.2%) | 21.7% | 1,182 (46.0%) | 933 (45.5%) |  |
| Overweight (25 to <30) | 231,701 (26.4%) | 180,156 (26.2%) | 22.2% | 689 (26.8%) | 561 (27.3%) |  |
| Obesity class I (30 to <35) | 102,031 (11.6%) | 79,332 (11.5%) | 22.2% | 332 (12.9%) | 261 (12.7%) |  |
| Obesity class II (35 to <40) | 40,622 (4.6%) | 31,795 (4.6%) | 21.7% | 146 (5.7%) | 121 (5.9%) |  |
| Obesity class III (≥40) | 21,340 (2.4%) | 16,819 (2.4%) | 21.2% | 107 (4.2%) | 86 (4.2%) |  |
| *Pregnancy related characteristics* |  |  |  |  |  |  |
| Previous number of miscarriages |  |  |  |  |  | **0.447** |
| 0 | 746,282 (85.1%) | 564,582 (86.7%) | 24.3% | 2,152 (83.8%) | 1,677 (85.3%) |  |
| 1 | 95,423 (10.9%) | 63,087 (9.7%) | 33.9% | 309 (12.0%) | 219 (11.1%) |  |
| 2 | 24,330 (2.8%) | 16,158 (2.5%) | 33.6% | 70 (2.7%) | 42 (2.1%) |  |
| ≥3 | 10,594 (1.2%) | 7,092 (1.1%) | 33.1% | 37 (1.4%) | 27 (1.4%) |  |
| Smoking status at booking |  |  |  |  |  | **0.972** |
| Current | 98,909 (11.3%) | 82,894 (11.2%) | 16.2% | 402 (15.7%) | 349 (16.1%) |  |
| Ex smoker -after conception | 67,489 (7.7%) | 57,327 (7.7%) | 15.1% | 188 (7.3%) | 150 (6.9%) |  |
| Ex smoker -more than 1y before conception | 56,062 (6.4%) | 47,826 (6.5%) | 14.7% | 155 (6.0%) | 129 (6.0%) |  |
| Ex smoker -within 1y before conception | 32,633 (3.7%) | 27,449 (3.7%) | 15.9% | 69 (2.7%) | 60 (2.8%) |  |
| Never smoked | 499,071 (56.9%) | 422,733 (57.1%) | 15.3% | 1,432 (55.8%) | 1,192 (55.1%) |  |
| Non-smoker (history unknown) | 122,465 (14.0%) | 102,350 (13.8%) | 16.4% | 322 (12.5%) | 284 (13.1%) |  |
| Substance misuse status |  |  |  |  |  | **0.248** |
| Current use | 10,761 (1.2%) | 5,422 (0.9%) | 49.6% | 57 (2.2%) | 30 (1.7%) |  |
| Never used | 817,986 (93.3%) | 577,624 (95.4%) | 29.4% | 2,363 (92.0%) | 1,680 (93.3%) |  |
| Previously used | 47,882 (5.5%) | 22,679 (3.7%) | 52.6% | 148 (5.8%) | 91 (5.1%) |  |
| Alcohol units consumed per week |  |  |  |  |  | **<0.001** |
| 0 | 798,888 (91.1%) | 404,720 (96.9%) | 49.3% | 2,313 (90.1%) | 1,117 (96.8%) |  |
| 1 to 14 | 77,741 (8.9%) | 13,049 (3.1%) | 83.2% | 255 (9.9%) | 37 (3.2%) |  |
| Folic Acid Supplement |  |  |  |  |  | **0.533** |
| Has been taking prior to becoming pregnant | 265,765 (30.3%) | 176,467 (31.4%) | 33.6% | 604 (23.5%) | 385 (23.5%) |  |
| Not taking folic acid supplement | 65,736 (7.5%) | 41,664 (7.4%) | 36.6% | 244 (9.5%) | 173 (10.5%) |  |
| Started taking once pregnancy confirmed | 545,128 (62.2%) | 343,861 (61.2%) | 36.9% | 1,720 (67.0%) | 1,082 (66.0%) |  |
| Antenatal booking after 12 weeks |  |  |  |  |  | **1.00** |
| Yes | 143,024 (16.3%) | 142,853 (16.3%) | 0.1% | 523 (20.4%) | 523 (20.4%) |  |
| No | 733,605 (83.7%) | 733,776 (83.7%) | 0.0% | 2,045 (79.6%) | 2,045 (79.6%) |  |
| *Social complexities* |  |  |  |  |  |  |
| Complex Social Factors |  |  |  |  |  | **0.281** |
| Yes | 107,695 (12.3%) | 77,324 (11.5%) | 28.2% | 409 (15.9%) | 294 (14.7%) |  |
| No | 768,934 (87.7%) | 596,639 (88.5%) | 22.4% | 2,159 (84.1%) | 1,703 (85.3%) |  |
| Index of multiple deprivation (quintiles) |  |  |  |  |  | **0.998** |
| 1 - Most deprived | 224,719 (25.6%) | 220,924 (25.7%) | 1.7% | 802 (31.2%) | 787 (31.4%) |  |
| 2 | 199,195 (22.7%) | 195,288 (22.7%) | 2.0% | 620 (24.1%) | 611 (24.4%) |  |
| 3 | 168,477 (19.2%) | 165,242 (19.2%) | 1.9% | 476 (18.5%) | 461 (18.4%) |  |
| 4 | 152,917 (17.4%) | 150,080 (17.4%) | 1.9% | 369 (14.4%) | 359 (14.3%) |  |
| 5 - Least deprived | 131,321 (15.0%) | 128,761 (15.0%) | 1.9% | 301 (11.7%) | 288 (11.5%) |  |
| *Family history* |  |  |  |  |  |  |
| Congenital disorders |  |  |  |  |  | **1.00** |
| No | 858,507 (97.9%) | 858,507 (97.9%) | 0.0% | 2,511 (97.8%) | 2,511 (97.8%) |  |
| Yes | 18,122 (2.1%) | 18,122 (2.1%) | 0.0% | 57 (2.2%) | 57 (2.2%) |  |
| Inherited disorders |  |  |  |  |  | **1.00** |
| No | 860,129 (98.1%) | 860,129 (98.1%) | 0.0% | 2,520 (98.1%) | 2,520 (98.1%) |  |
| Yes | 16,500 (1.9%) | 16,500 (1.9%) | 0.0% | 48 (1.9%) | 48 (1.9%) |  |
| Diabetes |  |  |  |  |  | **<0.001** |
| No | 869,370 (99.2%) | 732,928 (83.6%) | 15.7% | 2,518 (98.1%) | 2,112 (82.2%) |  |
| Yes | 7,259 (0.8%) | 143,701 (16.4%) | -1879.6% | 50 (1.9%) | 456 (17.8%) |  |
| Hypertensive disorder |  |  |  |  |  | **1.00** |
| No | 746,767 (85.2%) | 746,767 (85.2%) | 0.0% | 2,207 (85.9%) | 2,207 (85.9%) |  |
| Yes | 129,862 (14.8%) | 129,862 (14.8%) | 0.0% | 361 (14.1%) | 361 (14.1%) |  |
| Mental health conditions |  |  |  |  |  | **1.00** |
| No | 844,910 (96.4%) | 844,910 (96.4%) | 0.0% | 2,481 (96.6%) | 2,481 (96.6%) |  |
| Yes | 31,719 (3.6%) | 31,719 (3.6%) | 0.0% | 87 (3.4%) | 87 (3.4%) |  |
| Multifetal |  |  |  |  |  | **1.00** |
| No | 832,090 (94.9%) | 832,090 (94.9%) | 0.0% | 2,411 (93.9%) | 2,411 (93.9%) |  |
| Yes | 44,539 (5.1%) | 44,539 (5.1%) | 0.0% | 157 (6.1%) | 157 (6.1%) |  |
| Pregnancy hypertension |  |  |  |  |  | **1.00** |
| No | 864,234 (98.6%) | 864,234 (98.6%) | 0.0% | 2,530 (98.5%) | 2,530 (98.5%) |  |
| Yes | 12,395 (1.4%) | 12,395 (1.4%) | 0.0% | 38 (1.5%) | 38 (1.5%) |  |
| *Health status at booking* |  |  |  |  |  |  |
| Hypertension |  |  |  |  |  | **1.00** |
| No | 870,940 (99.4%) | 870,940 (99.4%) | 0.0% | 2,556 (99.5%) | 2,556 (99.5%) |  |
| Yes | 5,689 (0.6%) | 5,689 (0.6%) | 0.0% | 12 (0.5%) | 12 (0.5%) |  |
| Gynaecological problems |  |  |  |  |  | **1.00** |
| No | 821,096 (93.7%) | 821,096 (93.7%) | 0.0% | 2,435 (94.8%) | 2,435 (94.8%) |  |
| Yes | 55,533 (6.3%) | 55,533 (6.3%) | 0.0% | 133 (5.2%) | 133 (5.2%) |  |
| Cardiac disorder |  |  |  |  |  | **1.00** |
| No | 870,451 (99.3%) | 870,451 (99.3%) | 0.0% | 2,555 (99.5%) | 2,555 (99.5%) |  |
| Yes | 6,178 (0.7%) | 6,178 (0.7%) | 0.0% | 13 (0.5%) | 13 (0.5%) |  |
| Mental health conditions |  |  |  |  |  | **1.00** |
| No | 819,749 (93.5%) | 819,749 (93.5%) | 0.0% | 2,376 (92.5%) | 2,376 (92.5%) |  |
| Yes | 56,880 (6.5%) | 56,880 (6.5%) | 0.0% | 192 (7.5%) | 192 (7.5%) |  |
| Pre-existing diabetes |  |  |  |  |  | **1.00** |
| No | 869,370 (99.2%) | 869,370 (99.2%) | 0.0% | 2,518 (98.1%) | 2,518 (98.1%) |  |
| Yes | 7,259 (0.8%) | 7,259 (0.8%) | 0.0% | 50 (1.9%) | 50 (1.9%) |  |
| *Adverse pregnancy outcomes* |  |  |  |  |  |  |
| Severe preeclampsia |  |  |  |  |  | **1.00** |
| No | 875,398 (99.9%) | 875,398 (99.9%) | 0.0% | 2,565 (99.9%) | 2,565 (99.9%) |  |
| Yes | 1,231 (0.1%) | 1,231 (0.1%) | 0.0% | 3 (0.1%) | 3 (0.1%) |  |
| Eclampsia |  |  |  |  |  | **1.00** |
| No | 876,196 (100.0%) | 876,196 (100.0%) | 0.0% | 2,565 (99.9%) | 2,565 (99.9%) |  |
| Yes | 433 (0.0%) | 433 (0.0%) | 0.0% | 3 (0.1%) | 3 (0.1%) |  |
| Gestation diabetes mellitus |  |  |  |  |  | **1.00** |
| No | 867,974 (99.0%) | 867,974 (99.0%) | 0.0% | 2,555 (99.5%) | 2,555 (99.5%) |  |
| Yes | 8,655 (1.0%) | 8,655 (1.0%) | 0.0% | 13 (0.5%) | 13 (0.5%) |  |
| Gestational hypertension |  |  |  |  |  | **1.00** |
| No | 873,928 (99.7%) | 873,928 (99.7%) | 0.0% | 2,561 (99.7%) | 2,561 (99.7%) |  |
| Yes | 2,701 (0.3%) | 2,701 (0.3%) | 0.0% | 7 (0.3%) | 7 (0.3%) |  |
| Antepartum haemorrhage |  |  |  |  |  | **1.00** |
| No | 873,694 (99.7%) | 873,694 (99.7%) | 0.0% | 2,557 (99.6%) | 2,557 (99.6%) |  |
| Yes | 2,935 (0.3%) | 2,935 (0.3%) | 0.0% | 11 (0.4%) | 11 (0.4%) |  |
| *Baby characteristics* |  |  |  |  |  |  |
| Fetal growth restriction (<10th percentile) |  |  |  |  |  | **0.113** |
| No | 749,387 (85.5%) | 466,641 (87.3%) | 37.7% | 1,364 (53.1%) | 875 (55.7%) |  |
| Yes | 127,242 (14.5%) | 67,995 (12.7%) | 46.6% | 1,204 (46.9%) | 696 (44.3%) |  |
