# Supplementary material for: Why current risk factor-based approaches fall short in predicting stillbirth: a national cohort study of nulliparous women in England
Source: Springer Nature journal article supplement (doi:10.1186/s12916-025-04598-7), 2026-01-22
Supplement: MOESM3 [file 12916_2025_4598_MOESM3_ESM.docx]

Additional file: Table 3

| Risk factor | Imputed data (RR 95% CI) | Complete-case data (RR 95% CI) |
| --- | --- | --- |
| Smoking - Current | 1.44 (1.28-1.62) | 1.68 (1.33-2.09) |
| Smoking - Ex-smoker after conception | 0.96 (0.82-1.13) | 1.26 (0.98-1.61) |
| Smoking - Ex-smoker >1y before conception | 0.96 (0.80-1.14) | 1.01 (0.73-1.35) |
| Smoking – Ex-smoker within 1y before conception | 0.81 (0.63–1.05) | 0.92 (0.57–1.41) |
| Smoking – Non-smoker (history unknown) | 1.00 (0.87–1.15) | 1.58 (0.97–2.42) |
| Ethnicity – Asian Indian/Bangladeshi | 1.50 (1.26–1.77) | 1.90 (1.31–2.66) |
| Ethnicity – Asian other | 1.28 (0.98–1.68) | 1.41 (0.77–2.34) |
| Ethnicity – Asian Pakistani | 1.83 (1.53–2.18) | 1.63 (1.01–2.46) |
| Ethnicity – Black African | 2.16 (1.78–2.63) | 2.77 (1.84–3.98) |
| Ethnicity – Black other | 1.88 (1.46-2.41) | 2.72 (1.72-4.08) |
| Ethnicity - Mixed | 1.18 (0.87-1.60) | 1.55 (0.87-2.55) |
| Ethnicity - Other | 1.07 (0.87-1.30) | 0.94 (0.56-1.49) |
| Ethnicity - White other | 0.99 (0.87-1.12) | 1.12 (0.87-1.42) |
| IMD - Most deprived (1) | 1.58 (1.38-1.81) | 1.98 (1.47-2.71) |
| IMD - 2nd quintile | 1.39 (1.21-1.60) | 1.51 (1.11-2.09) |
| IMD - 3rd quintile | 1.24 (1.07-1.44) | 1.61 (1.17-2.23) |
| IMD - 4th quintile | 1.08 (0.92-1.26) | 1.41 (1.02-1.98) |
| Age - <20 | 1.24 (1.05-1.46) | 1.71 (1.26-2.29) |
| Age - 20-24 | 1.18 (1.06-1.33) | 1.40 (1.11-1.76) |
| Age - 25-29 | 1.03 (0.93-1.14) | 0.99 (0.79-1.24) |
| Age - 35-39 | 1.22 (1.08-1.39) | 1.09 (0.81-1.45) |
| Age - ≥40 | 1.48 (1.19-1.85) | 1.42 (0.82-2.31) |
| Miscarriage history - 1 | 1.14 (0.99-1.31) | 1.36 (1.04-1.75) |
| Miscarriage history - 2 | 0.96 (0.73-1.27) | 0.94 (0.50-1.59) |
| Miscarriage history - ≥3 | 1.15 (0.77-1.74) | 1.63 (0.78-2.95) |
| BMI - Obesity I (30-34.9) | 1.21 (1.07-1.37) | 1.19 (0.91-1.55) |
| BMI - Obesity II (35-39.9) | 1.39 (1.16-1.67) | 1.80 (1.28-2.47) |
| BMI - Obesity III (≥40) | 1.84 (1.44-2.34) | 1.97 (1.27-2.91) |
| BMI - Overweight (25-29.9) | 1.13 (1.02-1.25) | 1.22 (1.00-1.48) |
| BMI - Underweight (<18.5) | 0.84 (0.67-1.04) | 0.99 (0.68-1.39) |
| Substance misuse - Current | 1.92 (1.37-2.67) | 2.86 (1.43-5.06) |
| Substance misuse - Previous | 1.43 (1.18-1.73) | 1.18 (0.81-1.64) |
| Alcohol - 1-14 units/week | 1.00 (0.72-1.38) | 1.22 (0.74-1.89) |
| Folic acid - Not taking | 1.87 (1.54-2.26) | 2.21 (1.62-2.97) |
| Folic acid - Started after conception | 1.40 (1.26-1.57) | 1.46 (1.21-1.78) |
| Complex social factors - Yes | 1.30 (1.15-1.46) | 1.72 (1.39-2.11) |
| Late booking (>12 weeks) | 1.31 (1.19-1.45) | 1.31 (1.05-1.61) |
| Severe preeclampsia - Yes | 0.83 (0.27-2.58) | 0.00 (0.00-0.00) |
| Eclampsia - Yes | 2.38 (0.76-7.40) | 7.01 (0.40-30.91) |
| Gestational diabetes - Yes | 0.51 (0.30-0.88) | 0.54 (0.17-1.26) |
| Gestational hypertension - Yes | 0.88 (0.42-1.86) | 0.69 (0.11-2.13) |
| Antepartum haemorrhage - Yes | 1.28 (0.71-2.32) | 0.97 (0.16-3.01) |
| Pre-existing hypertension - Yes | 0.72 (0.41-1.27) | 0.92 (0.33-1.99) |
| Pre-existing cardiac disorder - Yes | 0.72 (0.42-1.24) | 0.41 (0.10-1.07) |
| Pre-existing gynaecological disorder - Yes | 0.81 (0.68-0.96) | 0.82 (0.62-1.06) |
| Pre-existing mental health condition - Yes | 1.17 (1.01-1.35) | 1.15 (0.90-1.45) |
| Family history - Diabetes | 1.10 (1.00-1.22) | 1.10 (0.91-1.31) |
| Family history - Hypertension | 0.94 (0.84-1.05) | 0.98 (0.80-1.18) |
| Family history - Mental health condition | 0.93 (0.75-1.16) | 1.09 (0.80-1.44) |
| Family history - Multiple pregnancy | 1.22 (1.04-1.43) | 1.55 (1.24-1.91) |
| Family history - Pregnancy hypertension | 1.05 (0.76-1.44) | 1.13 (0.67-1.77) |
| Family history - Congenital disorder | 1.08 (0.83-1.40) | 0.98 (0.63-1.45) |
| Family history - Inherited disorder | 0.99 (0.75-1.32) | 0.92 (0.56-1.41) |
| Pre-existing diabetes - Yes | 2.39 (1.80-3.16) | 2.30 (1.23-3.88) |
| Fetal growth restriction - Yes | 4.56 (4.17-4.99) | 5.93 (5.04-6.98) |
